# Supplementary material for: BODIPY-based conjugated porous polymers for highly efficient volatile iodine capture
Source: Royal Society of Chemistry journal article supplement (doi:10.1039/c7ta00026j), 2017-01-01
Supplement: c7ta00026j1.pdf [file c7ta00026j1.pdf]

## Supporting Information

### BODIPY-Based Conjugated Porous Polymers for Efficient Volatile Iodine Captures

Yunlong Zhu,<sup>a,b</sup> Ya-Jian Ji,<sup>a,b</sup> De-Gao Wang,<sup>a</sup> Yi Zhang<sup>b</sup>, Hui Tang,<sup>c</sup> Xin-Ru Jia<sup>d</sup>, Min Song<sup>\*a</sup>,  
Guipeng Yu<sup>\*b</sup> and Gui-Chao Kuang<sup>\*a</sup>

<sup>a</sup>State Key Laboratory of Power Metallurgy, Changsha, Hunan 410083, P. R. China

<sup>b</sup>College of Chemistry and Chemical Engineering, Central South University, Changsha, Hunan 410083, P. R. China

<sup>c</sup>State Key Laboratory of Molecular Engineering of Polymers, Fudan University, Shanghai, 200438, P. R. China

<sup>d</sup>Beijing National Laboratory for Molecular Sciences and Key Laboratory of Polymer Chemistry and Physics of the Ministry of Education, College of Chemistry and Molecular Engineering, Peking University, Beijing, 100871, P. R. China

E-mail: [gckuang@csu.edu.cn](mailto:gckuang@csu.edu.cn), [gilbertyu@csu.edu.cn](mailto:gilbertyu@csu.edu.cn), [msong@csu.edu.cn](mailto:msong@csu.edu.cn)

#### Synthesis of some compounds

Monomer **1** and **2** was prepared according to literature <sup>[S1]</sup>.

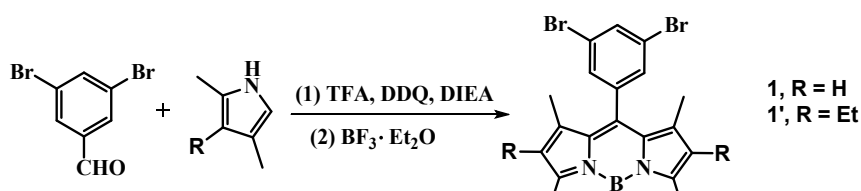

**Scheme S1.** Synthetic route for monomer **1** and **1'**.

*Monomer 1:* **1** was isolated as golden yellow crystal (115 mg, 24%). <sup>1</sup>H NMR (CDCl<sub>3</sub>): δ = 7.81 (t, *J* = 1.76 Hz, 1H), 7.44 (d, *J* = 1.80 Hz, 6H), 6.01 (s, 2H), 2.55 (s, 6H), 1.49 (s, 6H).

*Monomer 1':* **1'** was isolated as red crystal (419 mg, 26%). <sup>1</sup>H NMR (CDCl<sub>3</sub>): δ = 7.86 (t, *J* = 1.76 Hz, 1H), 7.41 (d, *J* = 1.72 Hz, 2H), 2.52 (s, 6H), 2.31 (m, *J* = 7.60 Hz, 4H), 1.38 (s, 6H), 1.00 (t, *J* = 7.60 Hz, 6H).

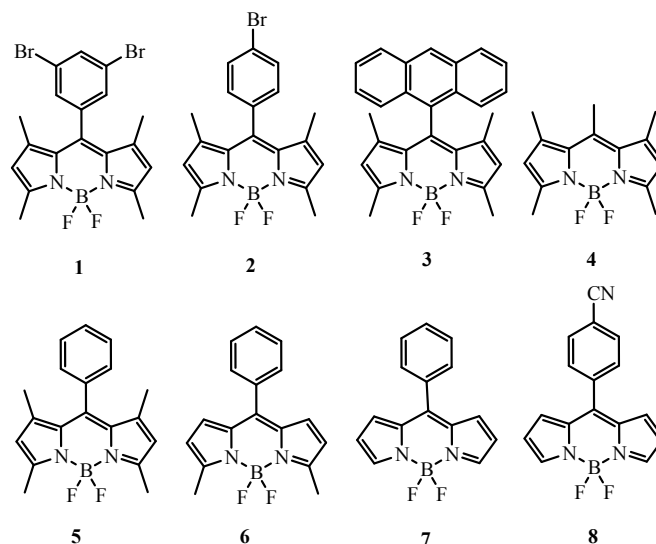

**Monomer 2:**  $^1\text{H NMR}$  ( $\text{CDCl}_3$ ):  $\delta = 7.65$  (d,  $J = 8.40$  Hz, 2H),  $7.18$  (d,  $J = 8.40$  Hz, 2H),  $5.99$  (s, 2H),  $2.55$  (s, 6H),  $1.41$  (s, 6H).

**Monomer 3:**  $^1\text{H NMR}$  ( $\text{CDCl}_3$ ):  $\delta = 8.57$  (s, 1H),  $8.04$  (d,  $J = 8.44$  Hz, 2H),  $7.91$  (d,  $J = 8.76$  Hz, 2H),  $7.49$  (t,  $J = 14.94$  Hz, 2H),  $7.43$  (t,  $J = 15.22$  Hz, 2H),  $2.63$  (s, 6H),  $0.65$  (s, 6H).

**Monomer 4:**  $^1\text{H NMR}$  ( $\text{CDCl}_3$ ):  $\delta = 6.05$  (s, 2H),  $2.58$  (s, 3H),  $2.52$  (s, 6H),  $2.41$  (s, 6H).

**Monomer 5:**  $^1\text{H NMR}$  ( $\text{CDCl}_3$ ):  $\delta = 7.48$  (m, 3H),  $7.28$  (m, 2H),  $5.98$  (s, 2H),  $2.56$  (s, 6H),  $1.37$  (s, 6H).

**Monomer 6:**  $^1\text{H NMR}$  ( $\text{CDCl}_3$ ):  $\delta = 7.49$  (m, 5H),  $6.71$  (d,  $J = 4.12$  Hz, 2H),  $6.27$  (d,  $J = 4.12$  Hz, 2H),  $2.65$  (s, 6H).

**Monomer 7:**  $^1\text{H NMR}$  ( $\text{CDCl}_3$ ):  $\delta = 7.95$  (s, 2H),  $7.57$  (m, 5H),  $6.94$  (d,  $J = 4.16$  Hz, 2H),  $6.55$  (d,  $J = 3.76$  Hz, 2H).

**Monomer 8:**  $^1\text{H NMR}$  ( $\text{CDCl}_3$ ):  $\delta = 7.99$  (s, 2H),  $7.85$  (d,  $J = 8.30$  Hz, 2H),  $7.69$  (d,  $J = 8.35$  Hz, 2H),  $6.84$  (d,  $J = 4.20$  Hz, 2H),  $6.58$  (d,  $J = 4.05$  Hz, 2H).

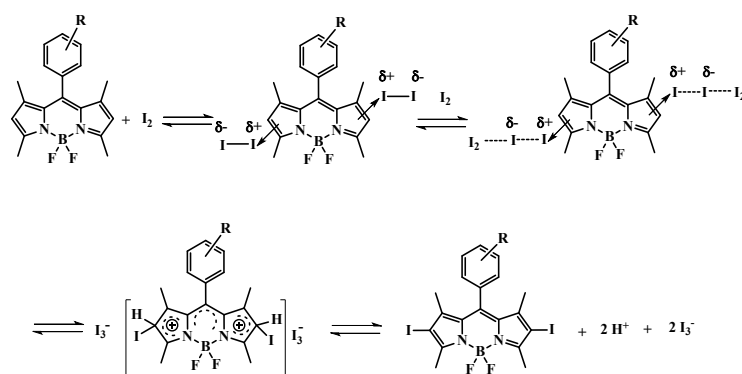

**Scheme S2.** A mechanistic proposal for this iodination reaction.

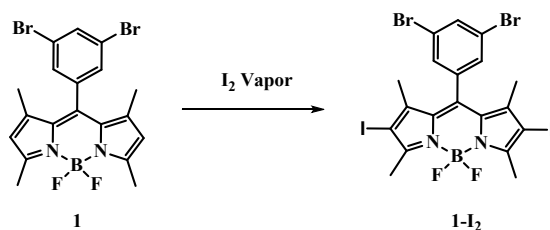

**Scheme S3.** Synthetic route for compound **1-I<sub>2</sub>**.

**Compound 1-I<sub>2</sub>:** Monomer **1** (10 mg, 0.02 mmol) was dissolved in anhydrous CH<sub>2</sub>Cl<sub>2</sub> (15 mL) and then followed by spraying on a big silica gel plate (5 × 20 cm). The air dry plate was placed in wild-mouth bottle filled with iodine at the bottom. After staining by iodine vapor for 16 hrs at room temperature, the red silica gel was scraped from plate and the organic compound was extracted by DCM. The solvent was evaporated and the residue was chromatographed on silica gel using PE/DCM = 5:1 to afford **1-I<sub>2</sub>** as a red crystal (15 mg, 100%). <sup>1</sup>H NMR (CDCl<sub>3</sub>): δ = 7.86 (t, *J* = 1.76 Hz, 1H), 7.41 (d, *J* = 1.72 Hz, 2H), 2.64 (s, 6H), 1.51 (s, 6H). <sup>13</sup>C NMR (CDCl<sub>3</sub>): δ = 157.9, 145.0, 138.2, 137.0, 135.4, 130.9, 130.0, 124.1, 86.4, 17.7, 16.3. HRMS (ESI): *m/z* calculated for C<sub>19</sub>H<sub>16</sub>BBR<sub>2</sub>F<sub>2</sub>I<sub>2</sub>N<sub>2</sub>:732.7831 [M+H]<sup>+</sup>; found, 732.8387.

The Compound **n-I<sub>2</sub>** (n=2,3,4,5,6,7,8) were obtained by the method as the Compound **1-I<sub>2</sub>**.

**Compound 2-I<sub>2</sub>:** <sup>1</sup>H NMR (CDCl<sub>3</sub>): δ = 7.68 (d, *J* = 8.40 Hz, 2H), 7.15 (d, *J* = 8.40 Hz, 2H), 2.64 (s, 6H), 1.43 (s, 6H).

**Compound 3-I<sub>2</sub>:** <sup>1</sup>H NMR (CDCl<sub>3</sub>): δ = 8.63 (s, 1H), 8.06 (d, *J* = 8.45 Hz, 2H), 7.82 (d, *J* = 8.55 Hz, 2H), 7.51 (t, *J* = 14.40 Hz, 2H), 7.44 (t, *J* = 14.30 Hz, 2H), 2.72 (s, 6H), 0.67 (s, 6H).

**Compound 4-I<sub>2</sub>:** <sup>1</sup>H NMR (CDCl<sub>3</sub>): δ = 2.64 (s, 3H), 2.61 (s, 6H), 2.47 (s, 6H).

**Compound 5-I<sub>2</sub>:** <sup>1</sup>H NMR (DMSO-d): δ = 7.59 (t, *J* = 3.20 Hz, 3H), 7.39 (m, 2H), 3.37 (s, 6H), 1.33 (s, 6H).

**Compound 6-I<sub>2</sub>:** <sup>1</sup>H NMR (CDCl<sub>3</sub>): δ = 7.93 (s, 2H), 7.87 (d, *J* = 8.52 Hz, 2H), 7.66 (d, *J* = 8.48 Hz, 2H), 7.01 (s, 2H).

**Compound 7-I<sub>2</sub>:** <sup>1</sup>H NMR (CDCl<sub>3</sub>): δ = 7.51 (m, 5H), 6.94 (s, 2H), 2.66 (s, 6H).

**Compound 8-I<sub>2</sub>:** <sup>1</sup>H NMR (CDCl<sub>3</sub>): δ = 7.53 (m, 5H), 7.36 (s, 2H), 7.12 (t, *J* = 2.45 Hz, 2H).

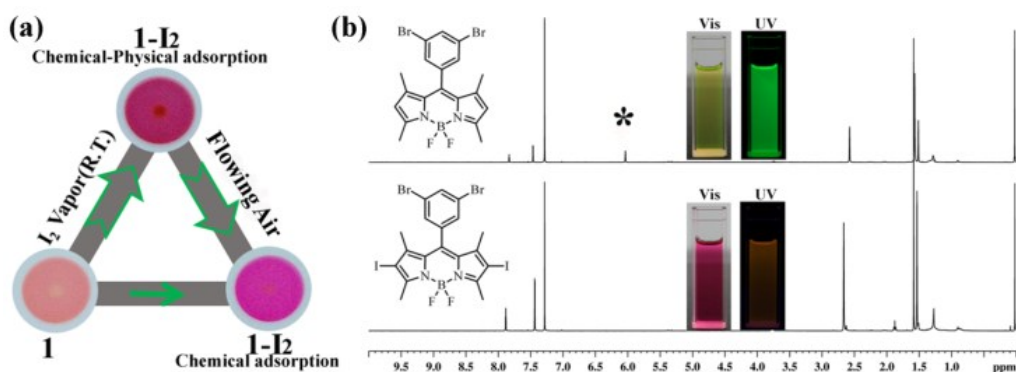

**Fig. S1** (a) TLC spot diagram of the iodine staining process; (b)  $^1\text{H}$  NMR spectra of monomer **1** and corresponding iodine stain product **1-I<sub>2</sub>**. The insets are their corresponding photographs of DCM solution of **1** and **1-I<sub>2</sub>** under visible light (left) and UV lamp (right).

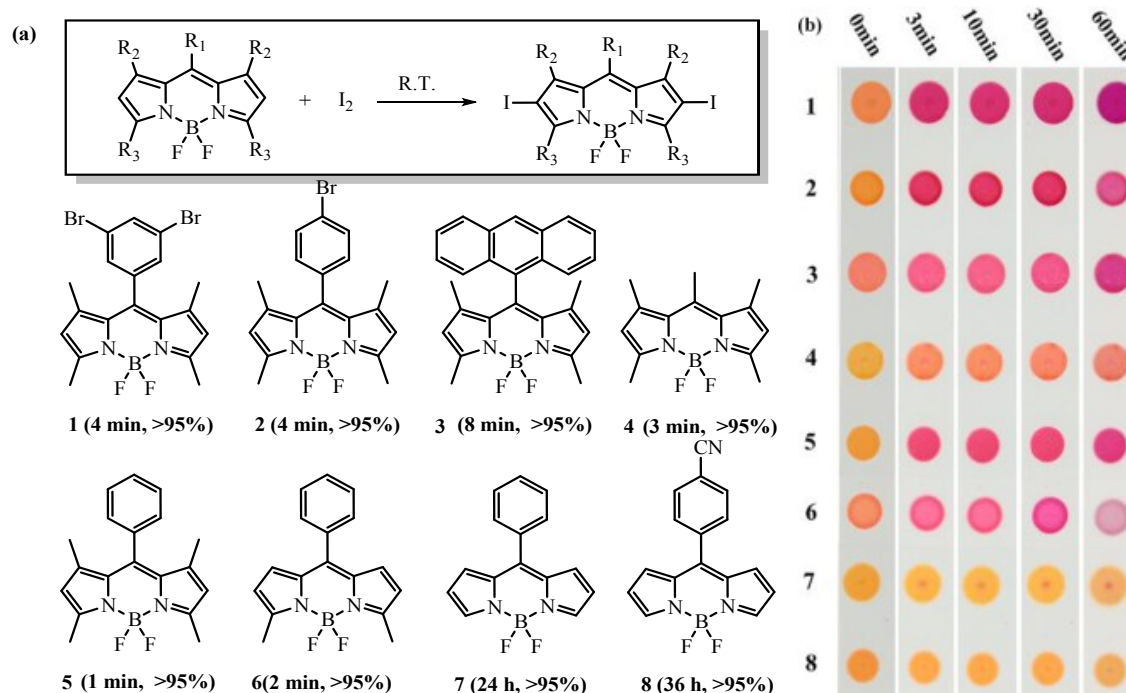

**Fig. S2** (a) BODIPY iodination reaction with volatile iodine and the effect of BODIPY on this reaction, time for iodination is determined by TLC, followed by the confirmation of a full conversion (>95%) by  $^1\text{H}$  NMR; (b) TLC images for the BODIPY derivatives under iodine vapor with different time at room temperature.

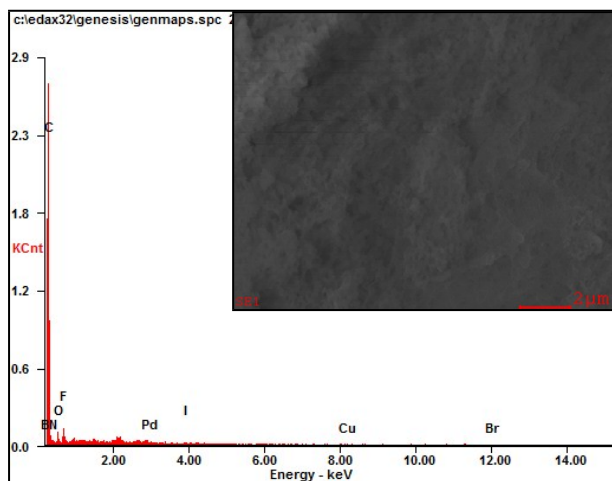

| <i>Element</i> | <i>Wt%</i> | <i>At%</i> |
|----------------|------------|------------|
| <i>BK</i>      | 03.62      | 04.21      |
| <i>CK</i>      | 83.91      | 87.67      |
| <i>NK</i>      | 05.32      | 04.77      |
| <i>FK</i>      | 04.59      | 03.03      |
| <i>PdL</i>     | 01.47      | 00.18      |
| <i>IL</i>      | 00.72      | 00.07      |
| <i>CuK</i>     | 00.37      | 00.07      |
| <i>Matrix</i>  | Correction | ZAF        |

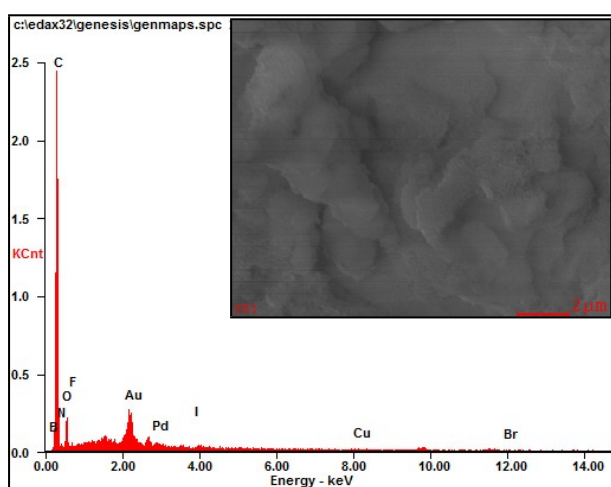

| <i>Element</i> | <i>Wt%</i> | <i>At%</i> |
|----------------|------------|------------|
| <i>BK</i>      | 03.61      | 04.10      |
| <i>CK</i>      | 89.62      | 91.36      |
| <i>NK</i>      | 04.38      | 03.83      |
| <i>FK</i>      | 00.76      | 00.48      |
| <i>PdL</i>     | 00.52      | 00.06      |
| <i>IL</i>      | 00.52      | 00.06      |
| <i>CuK</i>     | 00.58      | 00.11      |
| <i>Matrix</i>  | Correction | ZAF        |

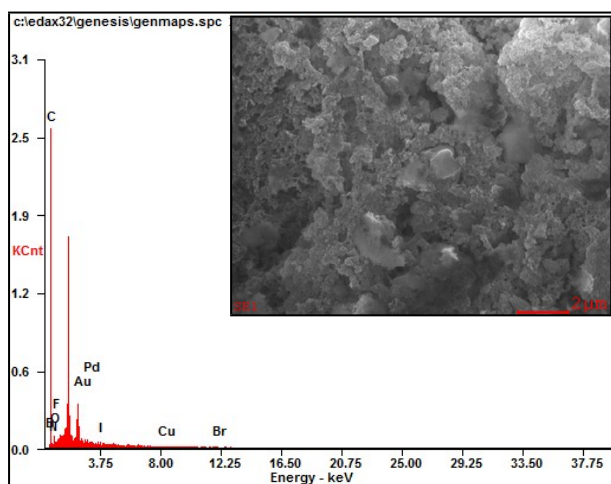

| <i>Element</i> | <i>Wt%</i> | <i>At%</i> |
|----------------|------------|------------|
| <i>BK</i>      | 03.41      | 03.85      |
| <i>CK</i>      | 92.61      | 94.15      |
| <i>NK</i>      | 01.79      | 01.56      |
| <i>FK</i>      | 00.26      | 00.17      |
| <i>PdL</i>     | 00.62      | 00.07      |
| <i>IL</i>      | 00.66      | 00.06      |
| <i>CuK</i>     | 00.65      | 00.14      |
| <i>Matrix</i>  | Correction | ZAF        |

**Fig. S3** The element content data of BDP-CPP-1, BDP-CPP-2 and NBDP-CPP (from up to down) by EDS analysis.

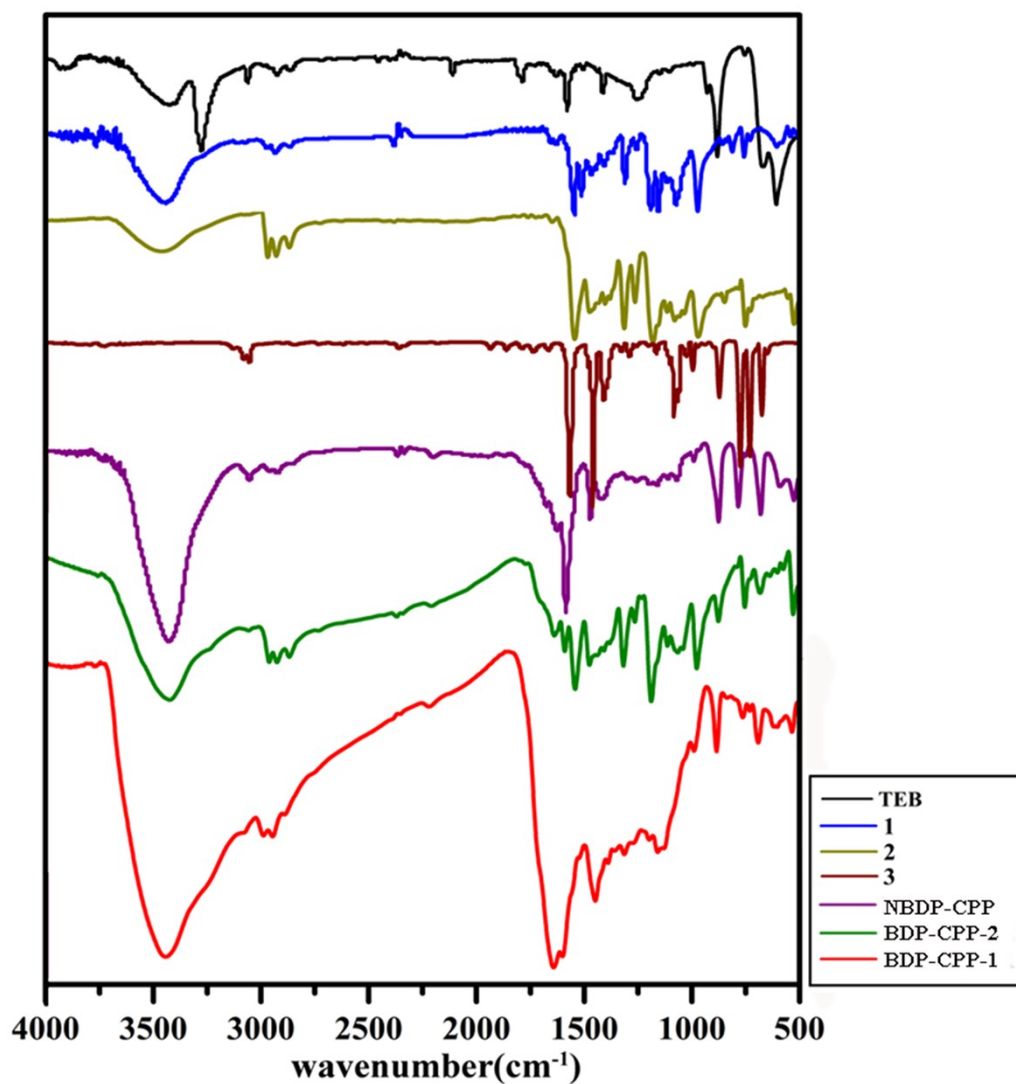

Fig. S4 IR spectra of monomers and CPPs.

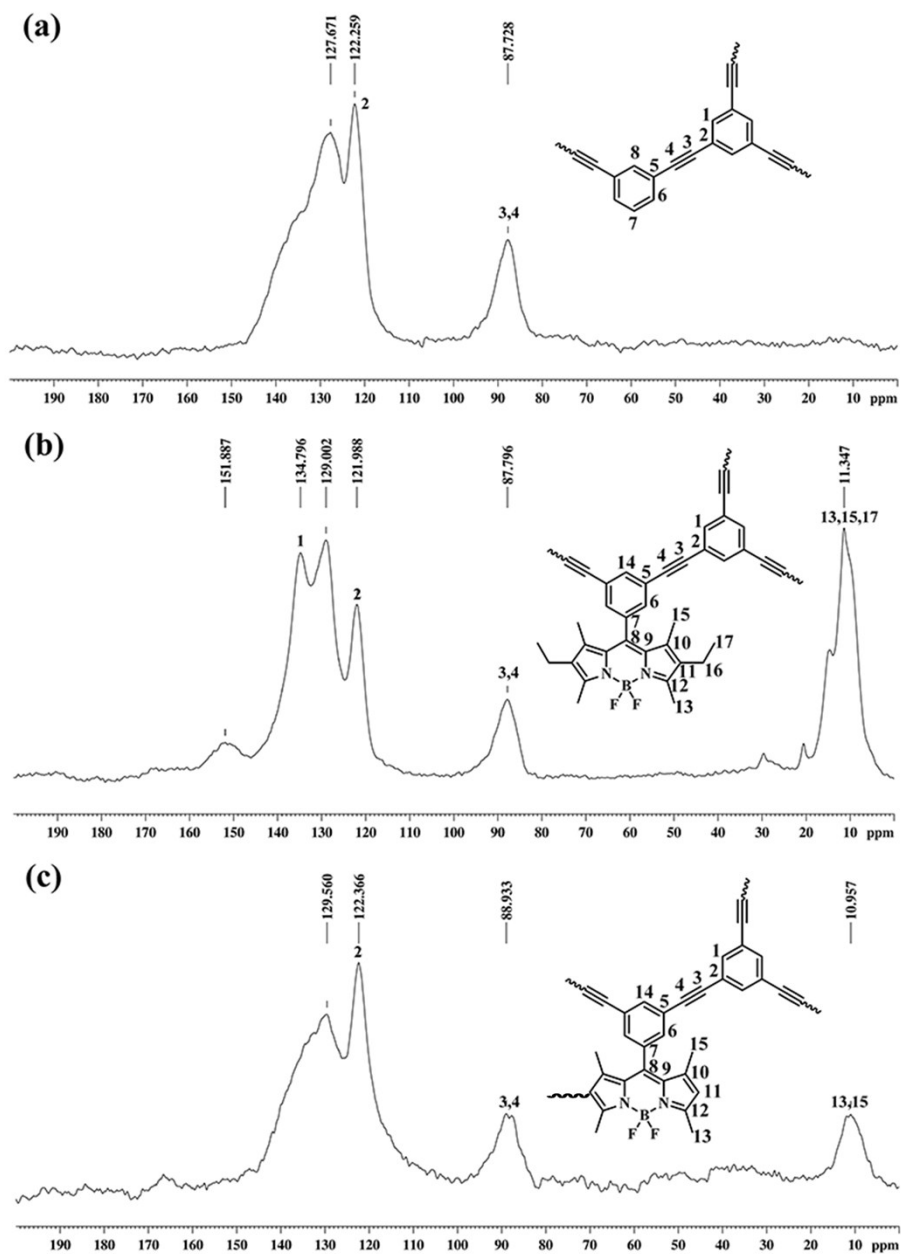

**Fig. S5** Solid state NMR spectra for **BDP-CPP-1**, **BDP-CPP-2** and **NBDP-CPP**.

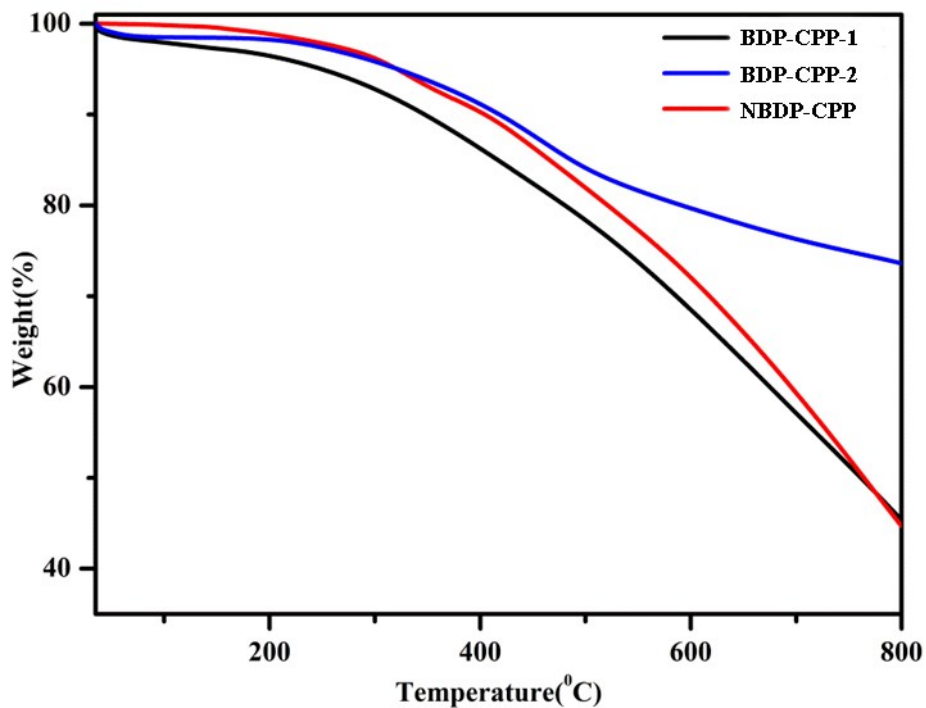

Fig. S6 TGA of BDP-CPP-1, BDP-CPP-2 and NBDP-CPP.

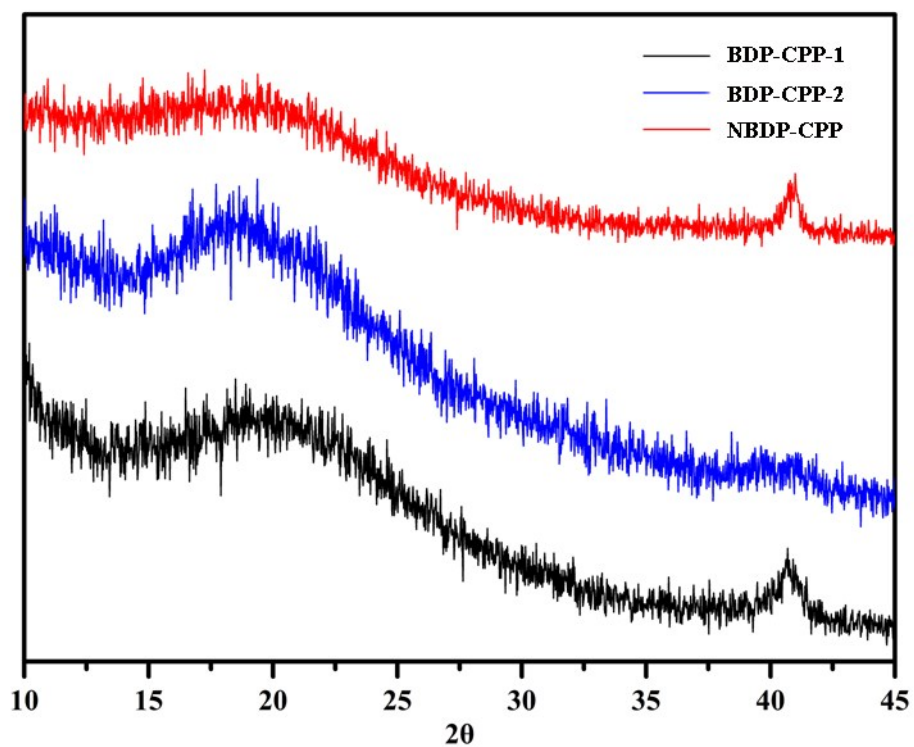

Fig. S7 XRD spectra of BDP-CPP-1, BDP-CPP-2 and NBDP-CPP.



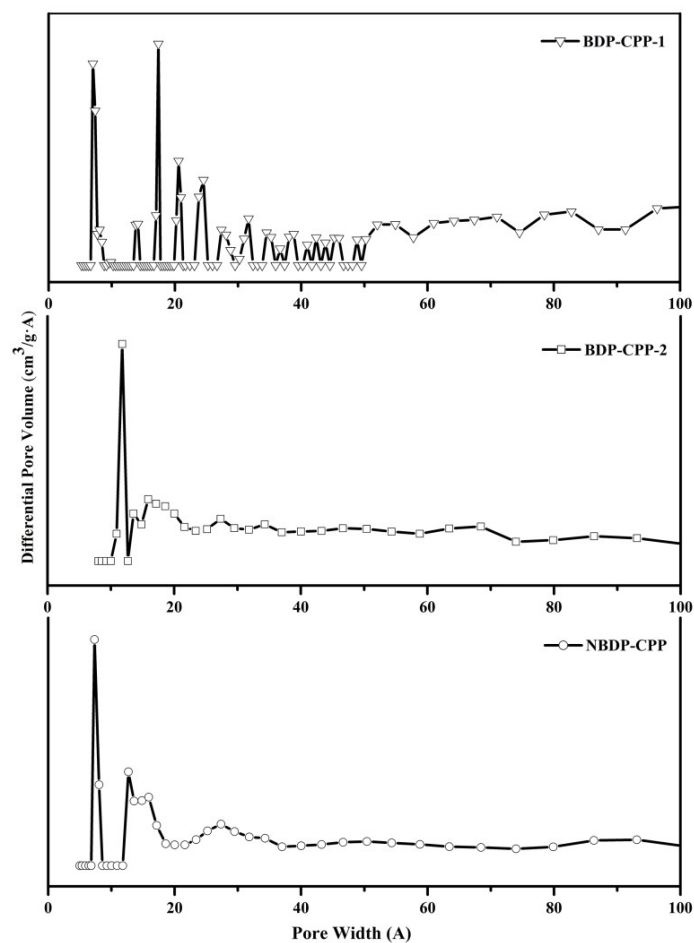

**Fig. S8** Pore size distribution for **BDP-CPP-1**, **BDP-CPP-2** and **NBDP-CPP** calculated by DFT.

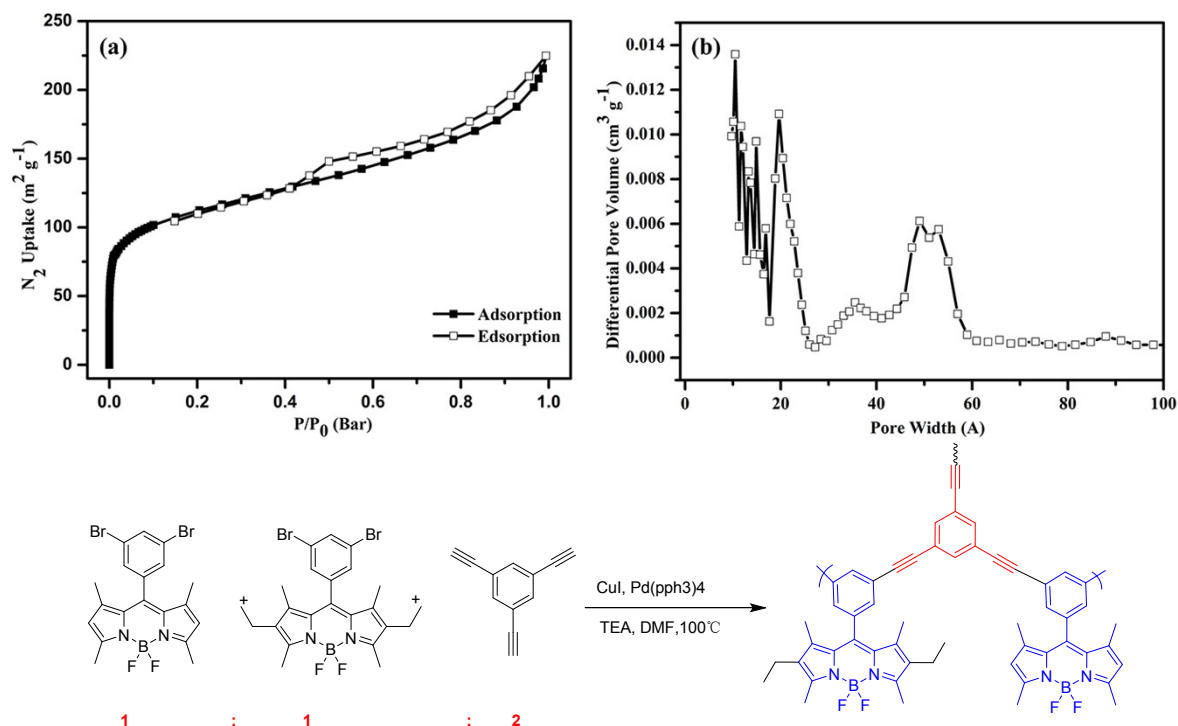

**Fig. S9** Nitrogen adsorption-desorption isotherms of **BDP-CPP-3** measured at 77 K (a), Pore size distribution for **BDP-CPP-3** calculated by DFT (b) and the route of **BDP-CPP-3** (c).

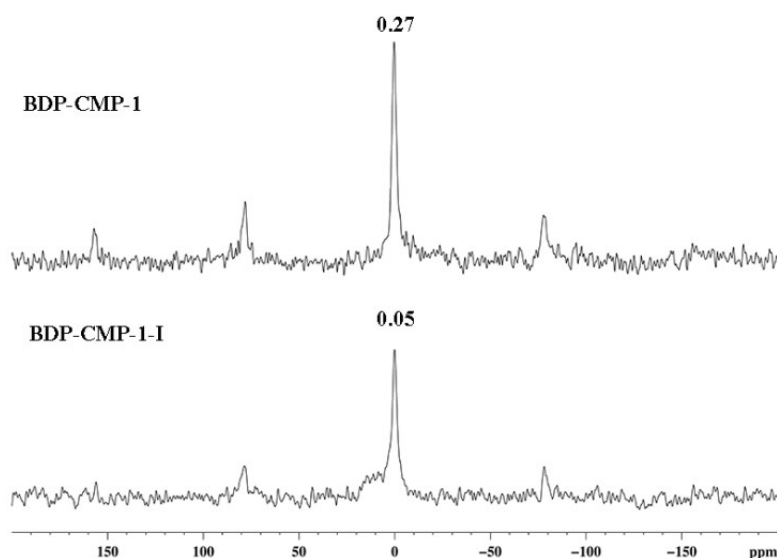

**Fig. S10** Solid-state <sup>11</sup>B MAS NMR spectra of **BDP-CPP-1** before and after iodine capture.

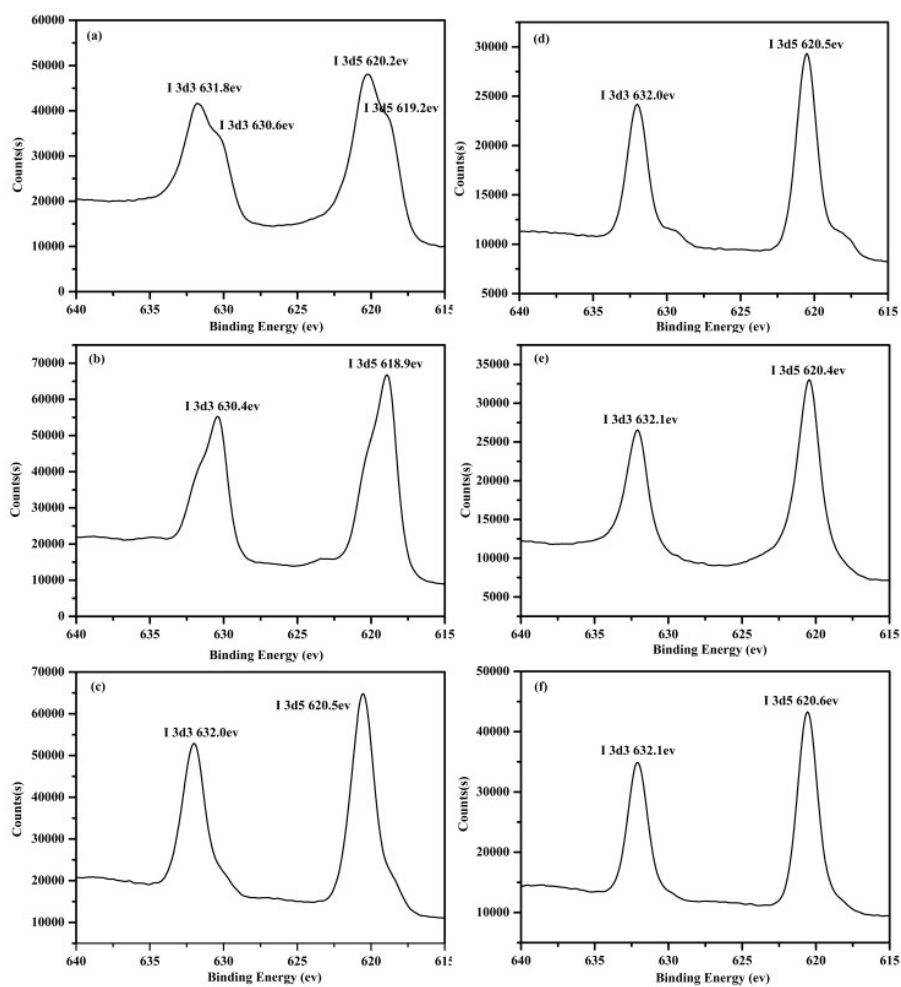

**Fig. S11** XPS spectra of (a) **BDP-CPP-1**, (b) **BDP-CPP-2** and (c) **NBDP-CPP** after iodine uptake, respectively. Iodine loaded (d) **BDP-CPP-1**, (e) **BDP-CPP-2** and (f) **NBDP-CPP** after washing by ethanol solvents for three days.

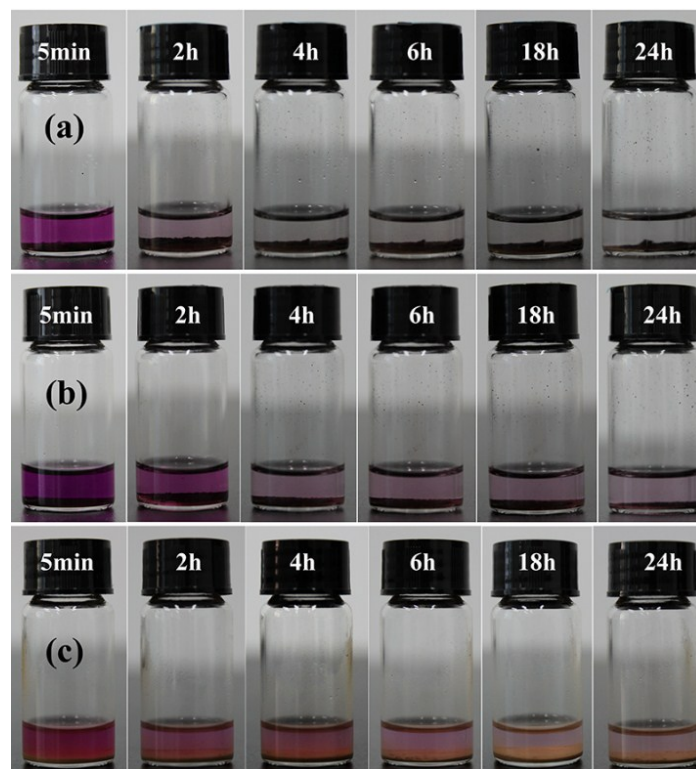

**Fig. S12** Photographs of (a) **BDP-CPP-1**, (b) **BDP-CPP-2**, and (c) **NBDP-CPP** absorption capacity of iodine in hexane solution from 5 min to 24 hrs. The same weight CPPs (16 mg) were immersed in the iodine solution ( $c = 8 \text{ mM}$ , 2 mL) at 25 °C.

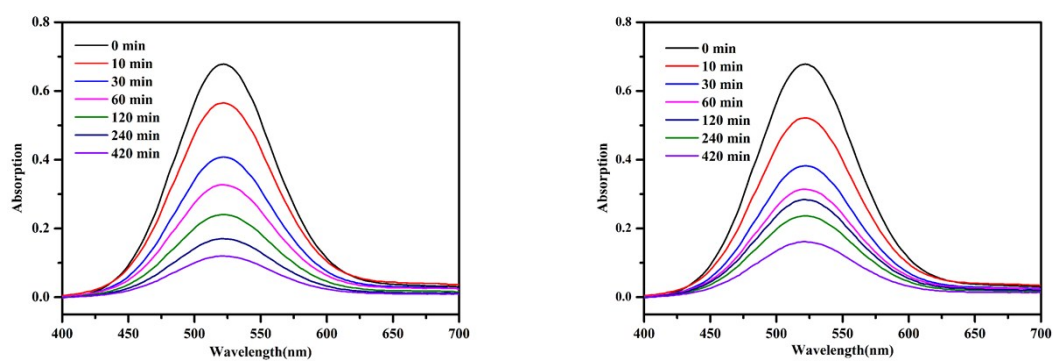

**Fig. S13** UV-vis absorption spectra for **BDP-CPP-2** and **NBDP-CPP** (16 mg) and iodine (212.0 mg/L) containing in hexane solution at different time. (left: **BDP-CPP-2**, right: **NBDP-CPP**)

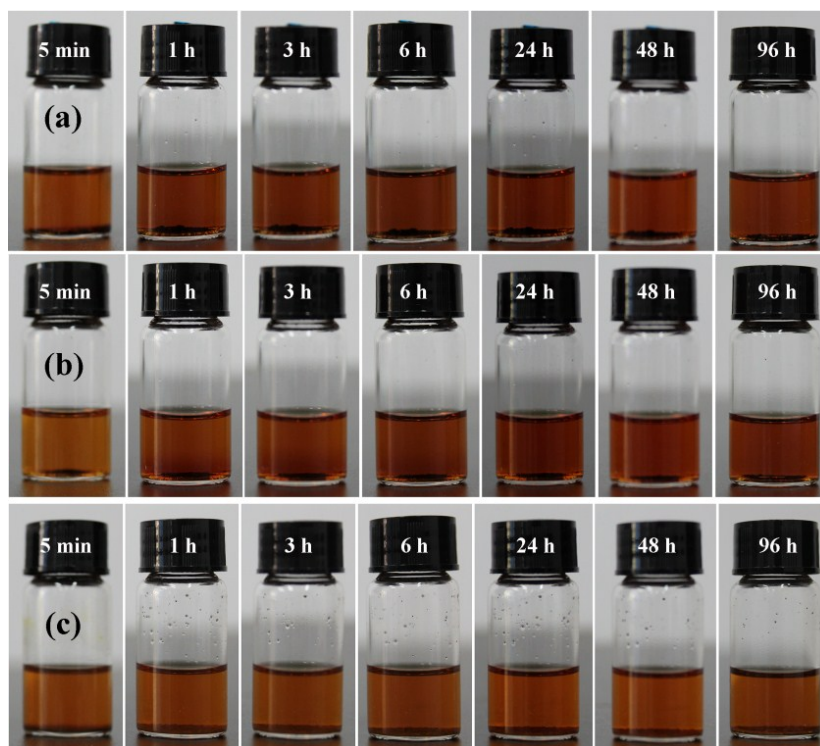

**Fig. S14** Photographs of (a) **BDP-CPP-1**, (b) **BDP-CPP-2**, and (c) **NBDP-CPP** desorption iodine in ethanol solution from 5 min to 96 hrs. The same weight iodine loaded CPPs (10 mg) were immersed in ethanol (4 mL) at 25 °C.

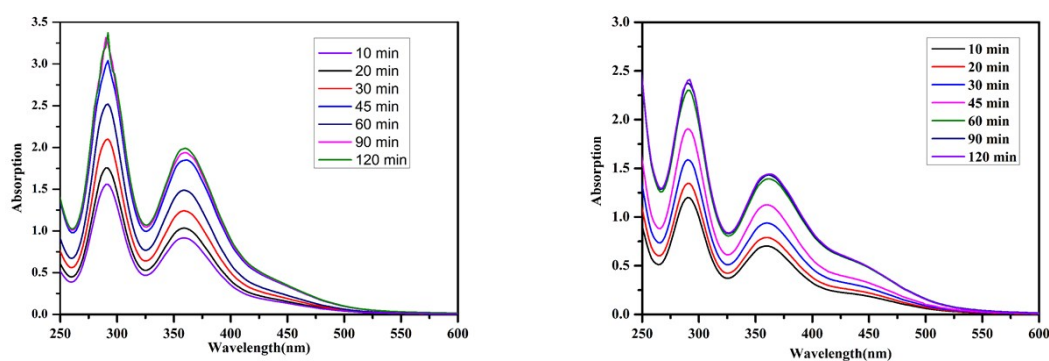

**Fig. S15** UV-vis spectra of iodine released from **BDP-CPP-2@I<sub>2</sub>** and **NBDP-CPP@I<sub>2</sub>** (12 mg) in 4 mL ethanol (left: **BDP-CPP-2@I<sub>2</sub>**, right: **NBDP-CPP@I<sub>2</sub>**).

## NMR and MASS spectra

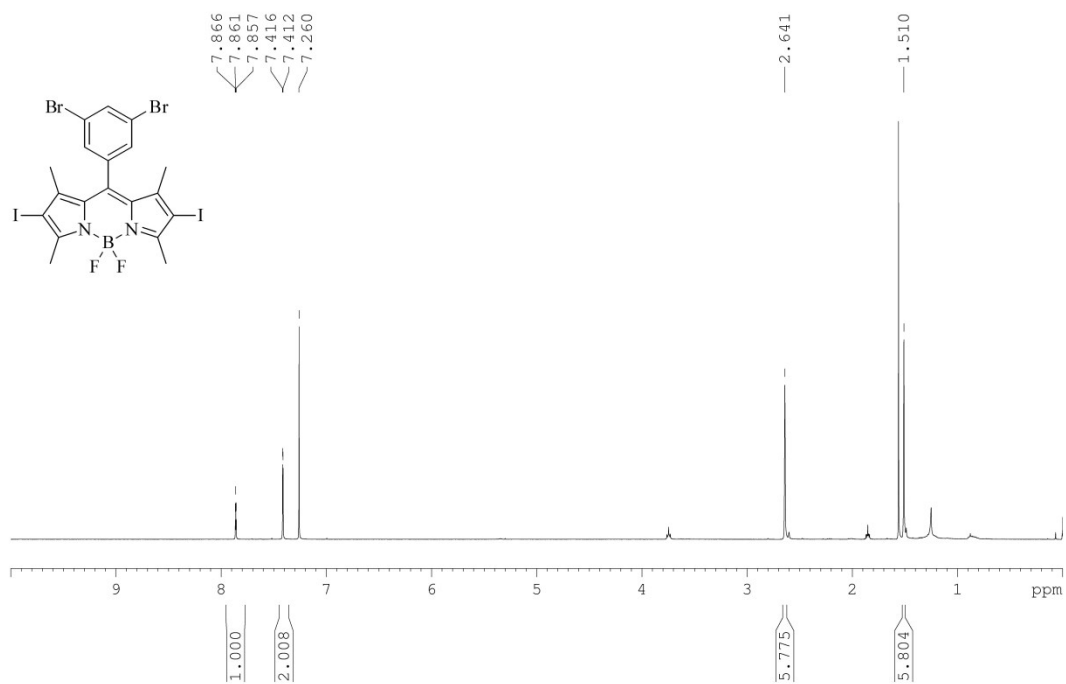

**Fig. S16** <sup>1</sup>H NMR spectrum of **1-I<sub>2</sub>**.

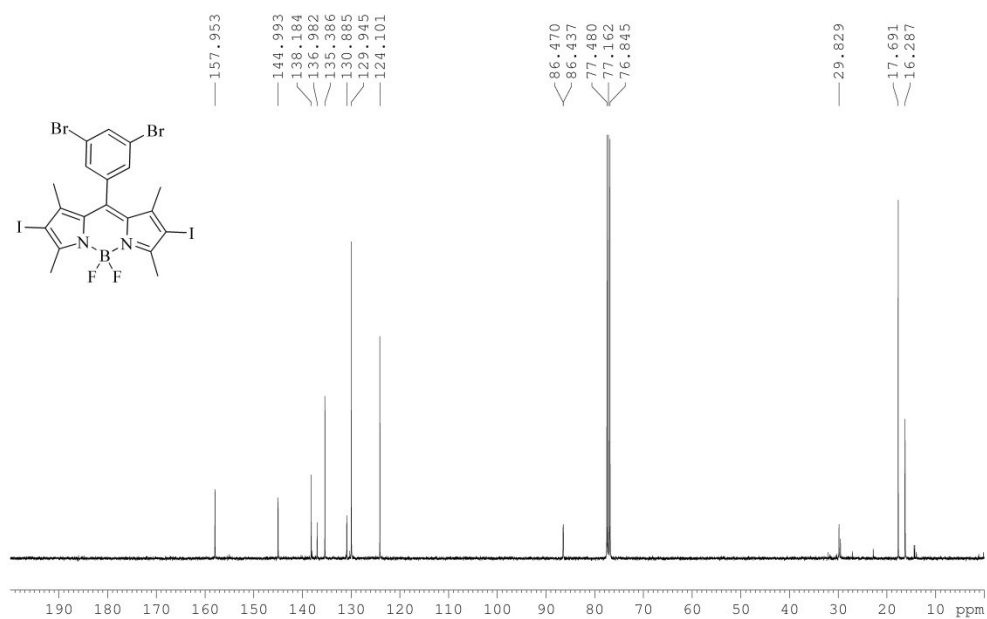

**Fig. S17** <sup>13</sup>C NMR spectrum of **1-I<sub>2</sub>**.

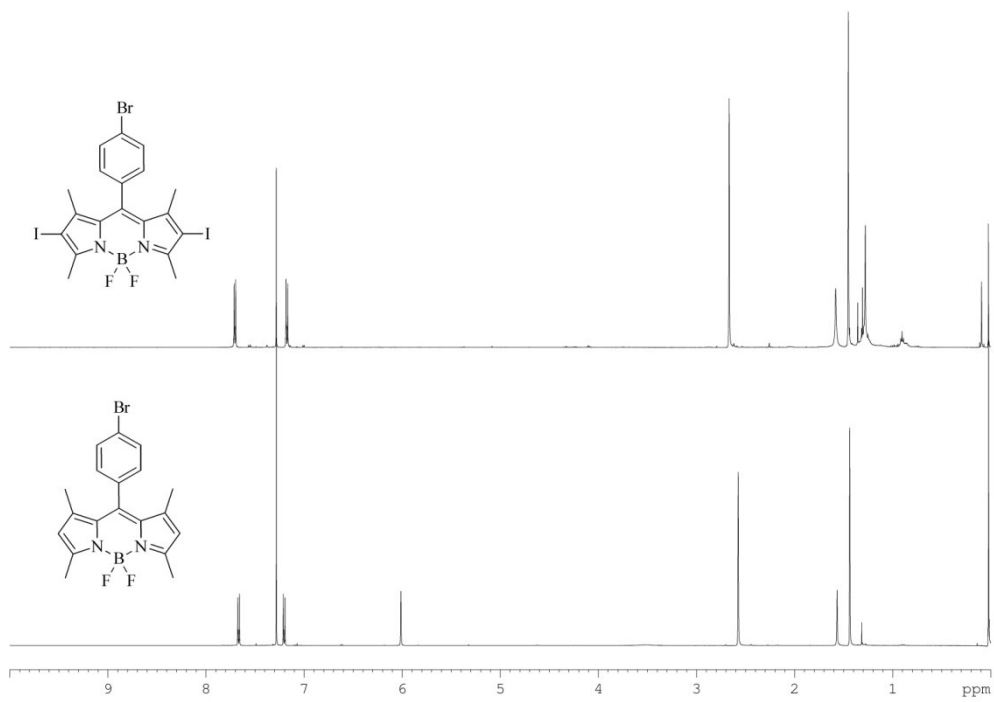

**Fig. S18** <sup>1</sup>H NMR spectrum of **2-I<sub>2</sub>** and **2**.

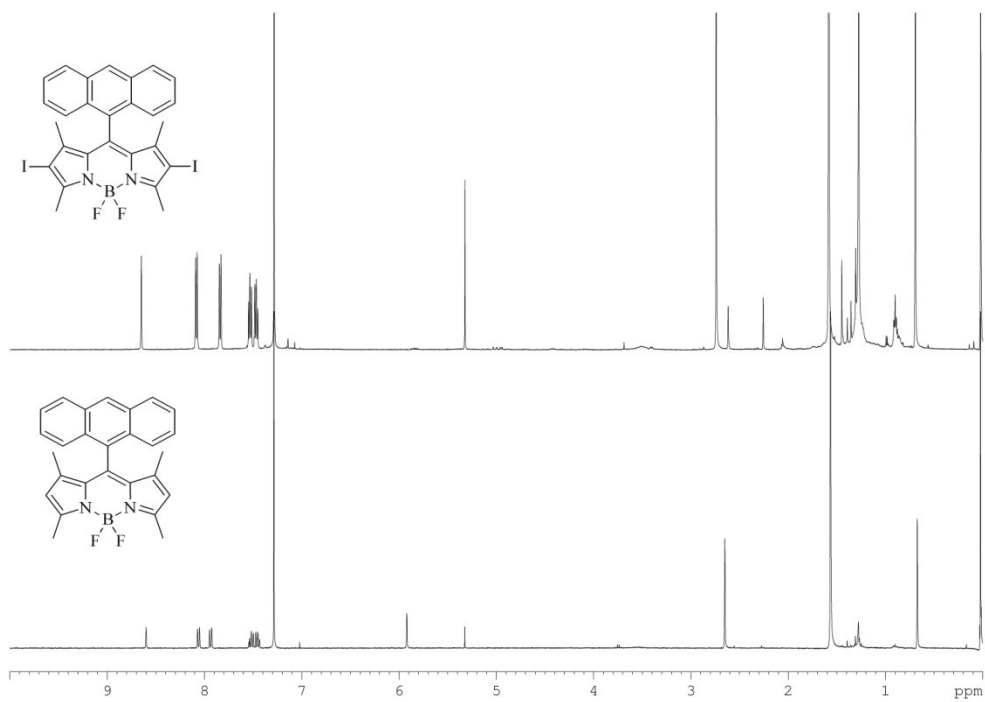

**Fig. S19** <sup>1</sup>H NMR spectrum of **3-I<sub>2</sub>** and **3**.

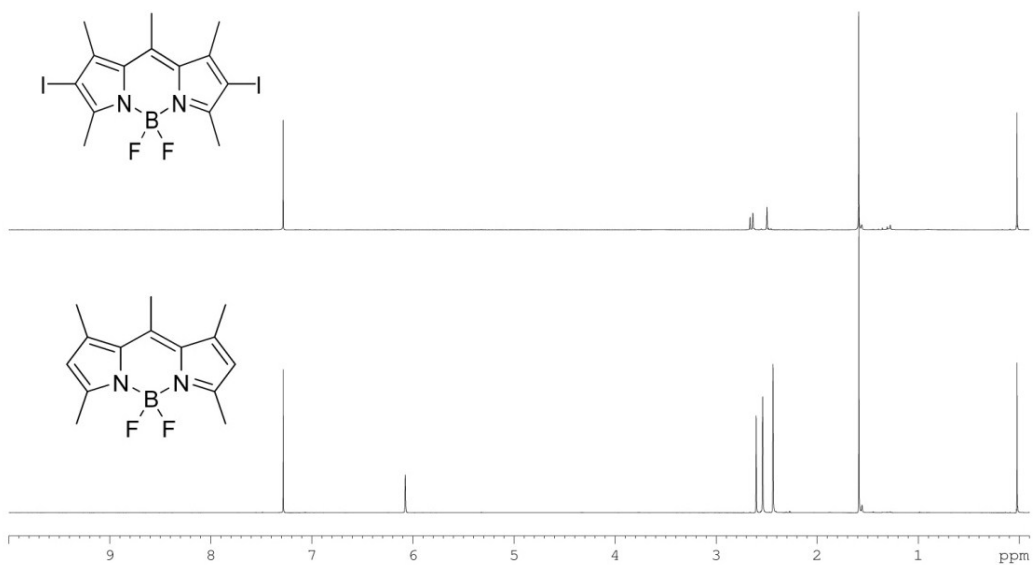

**Fig. S20** <sup>1</sup>H NMR spectrum of 4-I<sub>2</sub> and 4.

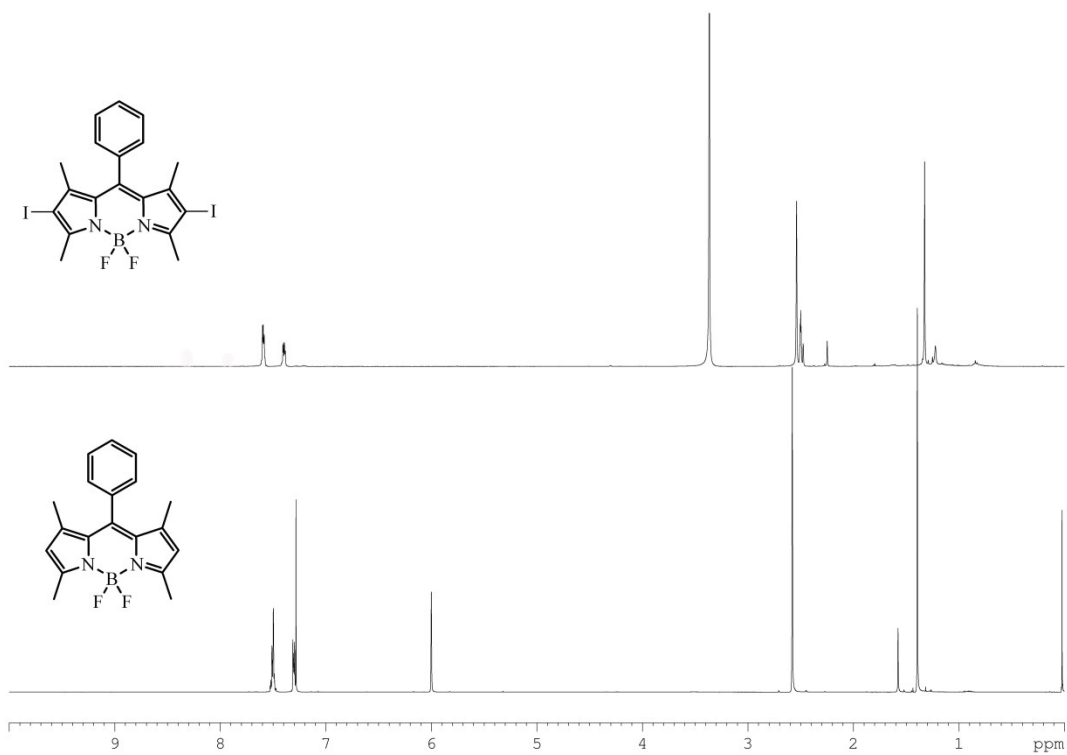

**Fig. S21** <sup>1</sup>H NMR spectrum of 5-I<sub>2</sub> and 5.

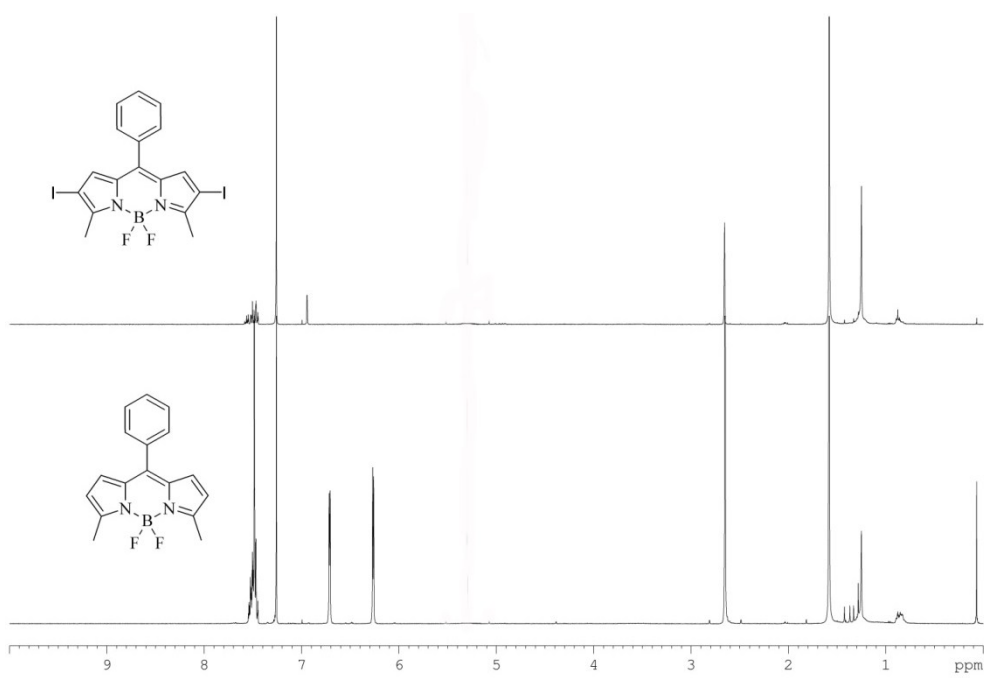

**Fig. S22** <sup>1</sup>H NMR spectrum of **6-I<sub>2</sub>** and **6**.

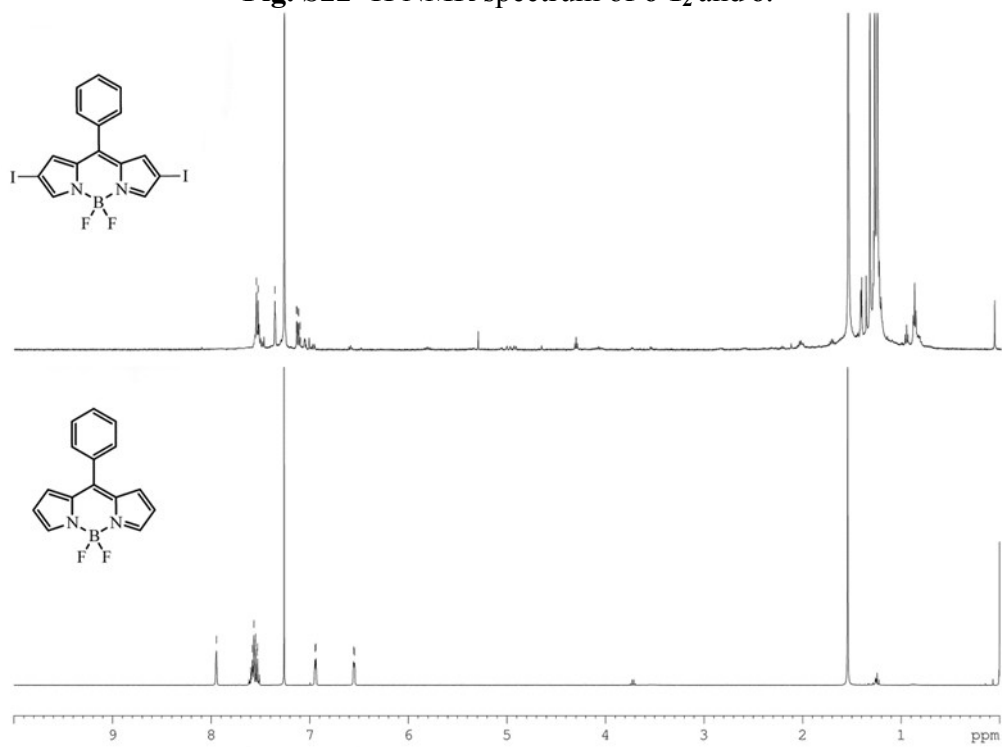

**Fig. S23** <sup>1</sup>H NMR spectrum of **7-I<sub>2</sub>** and **7**.



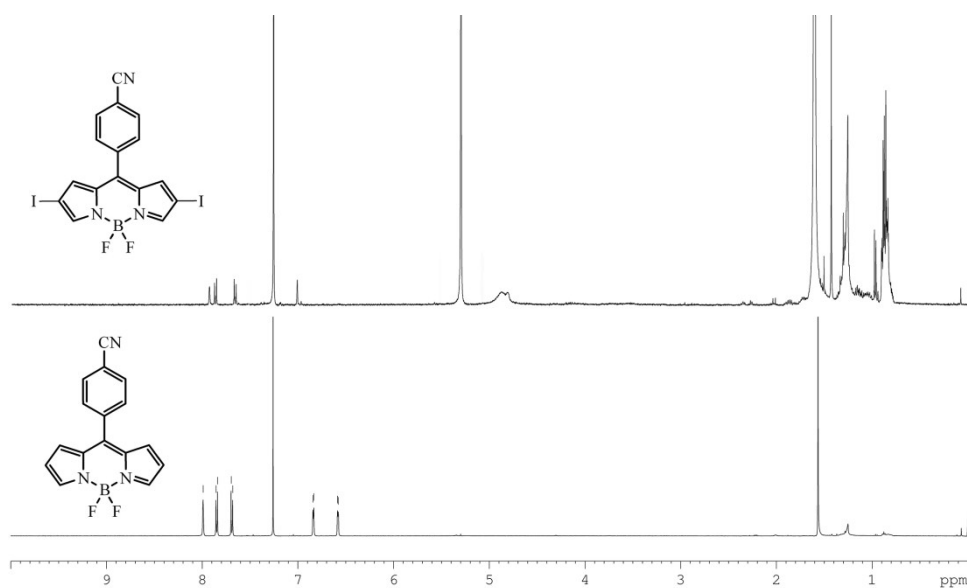

**Fig. S24**  $^1\text{H}$  NMR spectrum of **8-I<sub>2</sub>** and **8**.

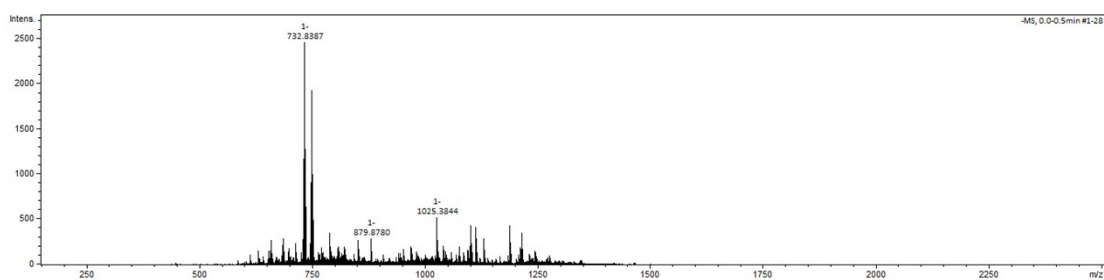

**Fig. S25** Mass spectrum of **1-I<sub>2</sub>**.

[s1] M. Benstead, G. A. Rosser, A. Beeby, G. H. Mehl and R. W. Boyle, *New J. Chem.*, 2011, **35**, 1410-1417.
